# Supplementary material for: Correlation between Neutrophil Extracellular Traps (NETs) Expression and Primary Graft Dysfunction Following Human Lung Transplantation
Source: MDPI journal article supplement (doi:10.3390/cells11213420), 2022-10-29
Supplement: s1 [file s1]

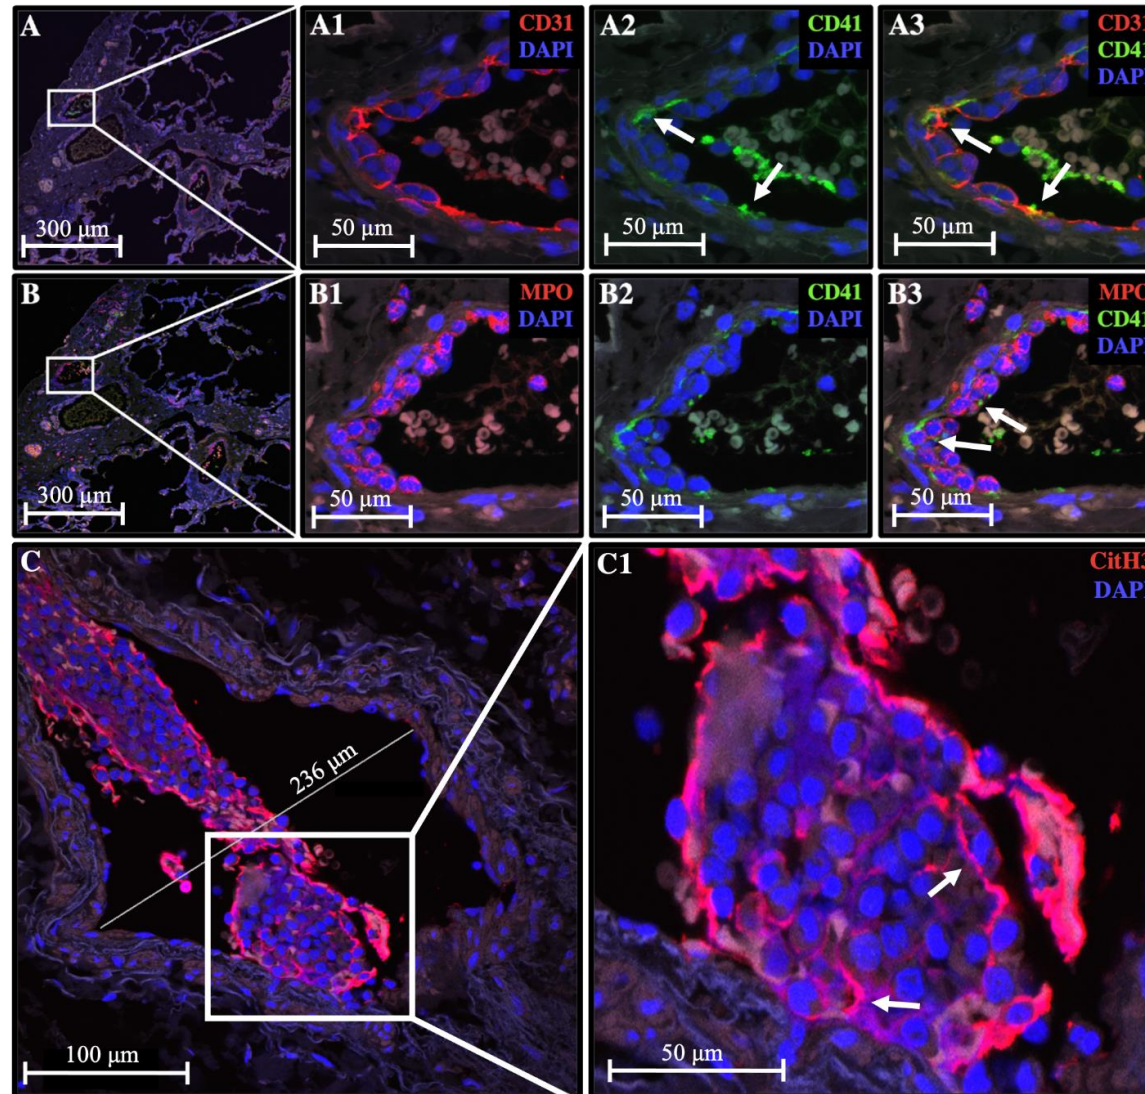

**Figure S1.** Representative confocal microscopy imaging of neutrophil-platelet and NETs endothelium interactions in a lung graft prior to transplant into a recipient who subsequently developed PGD3. In Figure A, platelets adhered onto and underneath the endothelium (white arrows, A2 and A3). In Figure B, numerous neutrophil-neutrophil (B1) and neutrophil-platelet (white arrows, B3) interactions were observed. In Figure C, the presence of NETs (CitH3; white arrows) in a neutrophilic thrombus was noted. CD31, endothelium; CD41, platelets; CitH3, NETs; MPO, neutrophils; DAPI, dsDNA. Original magnification, x240.

**Table S1.** Donors and recipients' levels of organ biomarkers

|                                              | All patients<br>(n = 36) | non-PGD3<br>(n = 27) | PGD3<br>(n = 9)    | <i>P</i> value |
|----------------------------------------------|--------------------------|----------------------|--------------------|----------------|
| <b><i>Donors</i></b>                         |                          |                      |                    |                |
| Troponin I level (ng/mL)                     | 53 (0-249)               | 10 (0-87)            | 280 (39-726)       | 0.019          |
| Alanine aminotransferase (U/L)               | 45 (20-94)               | 30 (19-94)           | 54 (26-91)         | 0.382          |
| Serum creatinine (mmol/L)                    | 65 (44-86)               | 59 (44-78)           | 123 (46 -386)      | 0.107          |
| Lactic acid (mmol/L)                         | N.A.                     | N.A.                 | N.A.               | N.A.           |
| <b><i>Recipients</i></b>                     |                          |                      |                    |                |
| Troponin I levels (ng/mL) <sup>a</sup>       |                          |                      |                    |                |
| 3hrs after 2 <sup>nd</sup> lung implantation | 455 [397-522]            | 398 [346-457]        | 659 [483-898]      | 0.140          |
| Day 1                                        | 534 [459-621]            | 526 [435-634]        | 586 [486-707]      | 0.684          |
| Day 2                                        | 396 [340-461]            | 389 [322-470]        | 423 [347-516]      | 0.758          |
| Day 3                                        | 315 [273-364]            | 312 [261-373]        | 337 [277-409]      | 0.768          |
| Alanine aminotransferase (U/L) <sup>a</sup>  |                          |                      |                    |                |
| 3hrs after 2 <sup>nd</sup> lung implantation | 20.2 [17.0-24.0]         | 14.5 [13.0-16.1]     | 54.2 [33.7-87.3]   | 0.008          |
| Day 1                                        | 30.9 [25.6-37.2]         | 22.3 [19.6-25.4]     | 77.1 [46.8-126.9]  | 0.017          |
| Day 2                                        | 31.5 [26.1-37.9]         | 22.3 [19.6-25.3]     | 81.7 [50.6-131.9]  | 0.010          |
| Day 3                                        | 35.6 [29.8-42.7]         | 24.6 [21.9-27.7]     | 96.8 [52.1-150.7]  | 0.003          |
| Serum creatinine (mmol/L) <sup>a</sup>       |                          |                      |                    |                |
| 3hrs after 2 <sup>nd</sup> lung implantation | 70.0 [66.8-73.4]         | 66.0 [63.1-68.7]     | 83.9 [74.8-94.2]   | 0.050          |
| Day 1                                        | 85.6 [80.4-91.2]         | 80.6 [75.0-87.0]     | 101.7 [92.0-112.6] | 0.068          |
| Day 2                                        | 80.9 [74.6-87.7]         | 77.5 [69.9-85.5]     | 92.7 [83.9-102.3]  | 0.204          |
| Day 3                                        | 73.6 [68.1-79.5]         | 70.1 [63.6-76.6]     | 86.0 [76.4-96.9]   | 0.167          |
| Lactic acid (mmol/L) <sup>a</sup>            |                          |                      |                    |                |
| 3hrs after 2 <sup>nd</sup> lung implantation | 2.53 [2.28-2.82]         | 2.11 [1.92-2.32]     | 4.39 [3.48-5.52]   | 0.004          |
| Day 1                                        | 1.91 [1.73-2.11]         | 1.57 [1.48-1.67]     | 3.41 [2.60-4.47]   | 0.006          |
| Day 2                                        | 1.48 [1.36-1.60]         | 1.42 [1.33-1.52]     | 1.70 [1.33-2.17]   | 0.482          |
| Day 3                                        | 1.39 [1.26-1.53]         | 1.22 [1.10-1.35]     | 2.02 [1.65-2.48]   | 0.030          |

Data are presented as frequencies (%), means  $\pm$  standard deviation, medians (IQR) or as <sup>a</sup>estimates [95% CI] from mixed-effect analysis where appropriate. N.A., not available.
